# Supplementary material for: Genotype-independent de novo regeneration protocol in Cannabis sativa L. through direct organogenesis from cotyledonary nodes
Source: Research Square preprint supplement (doi:10.21203/rs.3.rs-7237557/v1), 2025-08-20
Supplement: Supplementary file 2 [file c74ed9bffeb6ea075f82524d.docx]

**Genotype-independent *de novo* regeneration protocol in *Cannabis sativa* L. through direct organogenesis from cotyledonary nodes**

Praveen Lakshman Bennur1,2, Martin O’Brien1,2, Shyama C. Fernando1,2 and Monika S. Doblin1,2*

1Australian Research Council Research Hub for Medicinal Agriculture, School of Agriculture, Biomedicine and Environment, La Trobe University, Bundoora, Victoria 3086, Australia

2La Trobe Institute for Sustainable Agriculture and Food (LISAF), School of Agriculture, Biomedicine and Environment, La Trobe University, Bundoora, Victoria 3086, Australia

**Email address of each author:** [P.Bennur@latobe.edu.au](mailto:P.Bennur@latobe.edu.au), [Martin.OBrien@latrobe.edu.au](mailto:Martin.OBrien@latrobe.edu.au), [S.Fernando@latrobe.edu.au](mailto:S.Fernando@latrobe.edu.au), *[M.Doblin@latrobe.edu.au](mailto:M.Doblin@latrobe.edu.au) (corresponding author)

**Supplementary Tables**

**Table S1** Effect of 1% (v/v) H₂O₂ treatment on seed germination and endophyte contamination across hemp cultivars and medicinal cannabis lines

| **Cultivar** | | **No. of seeds** | **After 48 h in 1% (v/v) H2O2** | **After 5 d on GM** | | |
| --- | --- | --- | --- | --- | --- | --- |
| **Germination rate (%)** | **Endophyte-free seeds (%)** | **Endophyte-contaminated seeds (%)** | **Unresponsive seeds (%)** |
| Hemp | CRS-1 | 169 | 52.7 | 39.6 | 9 | 4.1 |
| CFX-2 | 192 | 81.3 | 63.5 | 14.6 | 3.1 |
| Katani | 174 | 76.4 | 40.8 | 25.9 | 9.8 |
| Futura-75 | 136 | 33.8 | 20.6 | 9.6 | 3.7 |
| Ferimon-12 | 152 | 48.7 | 25.0 | 18.4 | 5.3 |
| Medicinal cannabis | MC-1 | 50 | 96 | 76 | 0 | 20 |
| MC-2 | 50 | 96 | 68 | 0 | 28 |
| MC-3 | 50 | 86 | 72 | 0 | 14 |

Data are from a single replicate and presented as a percentage of total seeds

**Table S2** Shoot regeneration response of hemp cultivars using cotyledon and hypocotyl explants cultured on SRM for 5 weeks

| **Cultivar** | **No. of cotyledons** | **Cotyledon regeneration efficiency (%)** | **No. of hypocotyls** | **Hypocotyl regeneration efficiency (%)** |
| --- | --- | --- | --- | --- |
| CRS-1 | 2358 | 0.1 | 1179 | 0 |
| CFX-2 | 303 | 0 | 303 | 0 |
| Katani | 586 | 0 | 519 | 0 |
| Han FNH | 100 | 2 | 138 | 0 |
| Han FNQ | 60 | 1.7 | 100 | 0 |

Data are from three independent experiments

**Table S3** Shoot regeneration responses among different hemp cultivars using CN with cotyledon explants cultured on SRM for 5 weeks

| **Cultivar** | **No. of CN with cotyledon explants** | **Overall regeneration efficiency (%)** | **Shoots per responding explant** |
| --- | --- | --- | --- |
| CRS-1 | 54 | 7.4 | 1.8 |
| CFX-2 | 56 | 9.0 | 0 |
| Katani | 48 | 12.5 | 3 |
| Han FNH | 58 | 19.0 | 1.7 |
| Han FNQ | 54 | 22.2 | 1.3 |
| Bama | 36 | 8.4 | 0.5 |
| Puma | 48 | 8.4 | 4 |
| Yuma | 64 | 3.2 | 3 |
| Han Cold | 38 | 15.8 | 0 |
| Han NE | 54 | 9.3 | 1.8 |
| Si-1 | 40 | 20.0 | 2.4 |

Data from a single replicate with varying explant numbers. The overall regeneration efficiency is calculated based on the number of explants forming one or more shoots and expressed as a percentage of the total number of explants

**Table S4** Shoot regeneration response of hemp cultivars using CN with cotyledon explants cultured on SRM for 3 weeks

| **Cultivar** | **No. of CN with cotyledon explants** | **Overall regeneration efficiency (%)** | **Shoots per responding explant on SPM** |
| --- | --- | --- | --- |
| CFX-2 | 60 | 78.3 | 4.2 |
| Katani | 40 | 67.5 | 3.7 |
| Futura-75 | 8 | 75 | 3 |
| Ferimon-12 | 10 | 90 | 7.2 |

Data from a single replicate with varying explant numbers

**Table S5** Effect of control medium and SRM for 14 d on the responsiveness and overall regeneration efficiency of paired CN with cotyledon explants of Han FNH

| **Seed regeneration response** | **Overall regeneration efficiency (%)** | |
| --- | --- | --- |
| **Control** | **SRM** |
| Both explants | 8.3±4.2 | 54.2±7.2 |
| One explant | 32.0±19.7 | 31.9±6.4 |
| No explants | 59.7±23 | 13.9±10.5 |

Values show mean ± SD from three independent replicates (n=24 seeds for each replicate)

**Table S6** *De novo* shoot regeneration response of Han FNQ and three medicinal cannabis lines using CN with cotyledon explants on SRM for 14 d

| **Cultivar/lines** | | **No. of CN with cotyledon explants** | ***De novo* regeneration efficiency (%)** | **Shoots per responding explant on SPM** |
| --- | --- | --- | --- | --- |
| Hemp | Han FNQ | 50 | 78 | 7.1 |
| Medicinal cannabis | MC-1 | 75 | 84 | 7.6 |
| MC-2 | 36 | 91.7 | 6 |
| MC-3 | 34 | 85.3 | 7.3 |

Data from a single replicate with varying explant numbers

**Table S7** Comparison of shoot regeneration efficiency per seed among different CN explant types of Han FNH cultured on SRM for 14 d

| **Explant type** | **No. of seeds** | **No. of explants** | **Explants with axillary shoot/s** | **Axillary shoot regeneration (%)** | **Explants with *de novo* regeneration** | ***De novo* regeneration efficiency (%)** |
| --- | --- | --- | --- | --- | --- | --- |
| CN with cotyledon | 20 | 40 | 14 | 35 | 23 | 57.5 |
| Half-CN with half-cotyledon | 20 | 80 | 1 | 1.25 | 19 | 23.8 |
| Whole CN | 40 | 40 | 24 | 60 | 5 | 12.5 |

Data from a single replicate with varying explant numbers

**Table S8** Effect of different SRM exposure time on *de novo* regeneration response in CN with cotyledon explants of Han FNH

| **SRM exposure time** | **No. of CN with cotyledon explants showing regeneration (n=30)** | ***De novo* regeneration efficiency (%)** |
| --- | --- | --- |
| Control | 0 | 0 |
| 5 min vacuum infiltration  at 400 mbar | 0 | 0 |
| 1 d | 0 | 0 |
| 2 d | 2 | 6.7 |
| 4 d | 8 | 26.7 |
| 6 d | 9 | 30 |
| 8 d | 11 | 36.7 |
| 10 d | 15 | 50 |
| 12 d | 13 | 43.3 |
| 14 d | 13 | 43.3 |

Regeneration efficiency is calculated based on the number of explants forming *de novo* shoots and expressed as a percentage relative to the total number of explants

**Table S9** A list of medicinal species subjected to the CN with cotyledon based *de novo* shoot regeneration protocol

| **Scientific Name** | **Common Name** | **Classification** | | | **Growth Form** | **Geographic Origin** | **Germination** |
| --- | --- | --- | --- | --- | --- | --- | --- |
| **Clade** | **Order** | **Family** |
| *Aloe ferox* | Bitter aloe | Monocot | Asparagales | Asphodelaceae | Succulent | South Africa | Hypogeal |
| *Artemisia absinthium* | Common wormwood | Eudicot | Asterales | Asteraceae | Herb | North Africa, Asia | Epigeal |
| *Artemisia annua* | Sweet wormwood | Eudicot | Asterales | Asteraceae | Herb | North Africa, Asia | Epigeal |
| *Artemisia vulgaris* | Common mugwort | Eudicot | Asterales | Asteraceae | Herb | North Africa, Asia | Epigeal |
| *Borago officinalis* | Star flower | Eudicot | Boraginales | Boraginaceae | Herb | Europe | Epigeal |
| *Caesalpinia pulcherrima* | Pride of Barbados | Eudicot | Fabales | Fabaceae | Shrub | Central America | Epigeal |
| *Delonix regia* | Royal poinciana | Eudicot | Fabales | Fabaceae | Tree | Madagascar | Epigeal |
| *Echinacea purpurea* | Purple coneflower | Eudicot | Asterales | Asteraceae | Herb | North America | Hypogeal |

Shading indicates the species for which *de novo* regeneration was observed using the cannabis protocol outlined in Fig. S1
